# Supplementary material
Source: ML conference proceedings conference paper supplement (https://openreview.net/forum?id=aosmeS01n8)

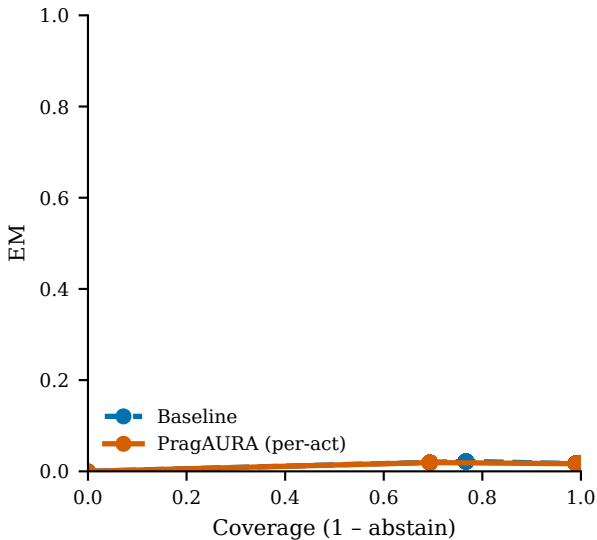

Supplement: supplementary_material [file fig_rc_hotpot_em.pdf › iclr/fig_rc_hotpot_em.pdf]

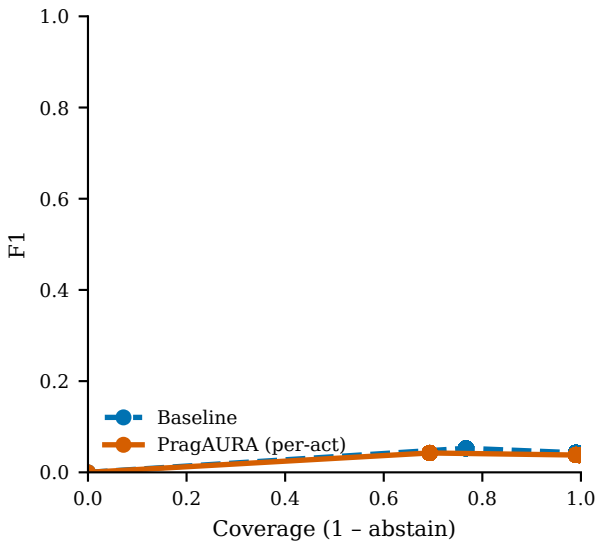

Supplement: supplementary_material [file fig_rc_hotpot_f1.pdf › iclr/fig_rc_hotpot_f1.pdf]

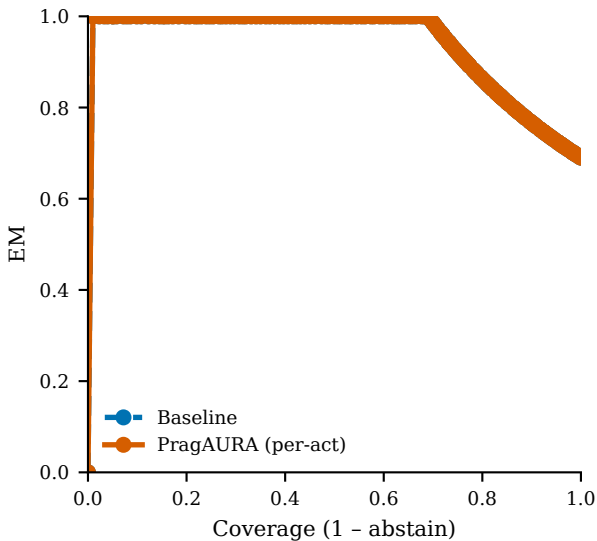

Supplement: supplementary_material [file fig_rc_squad_ablate_em.pdf › iclr/fig_rc_squad_ablate_em.pdf]

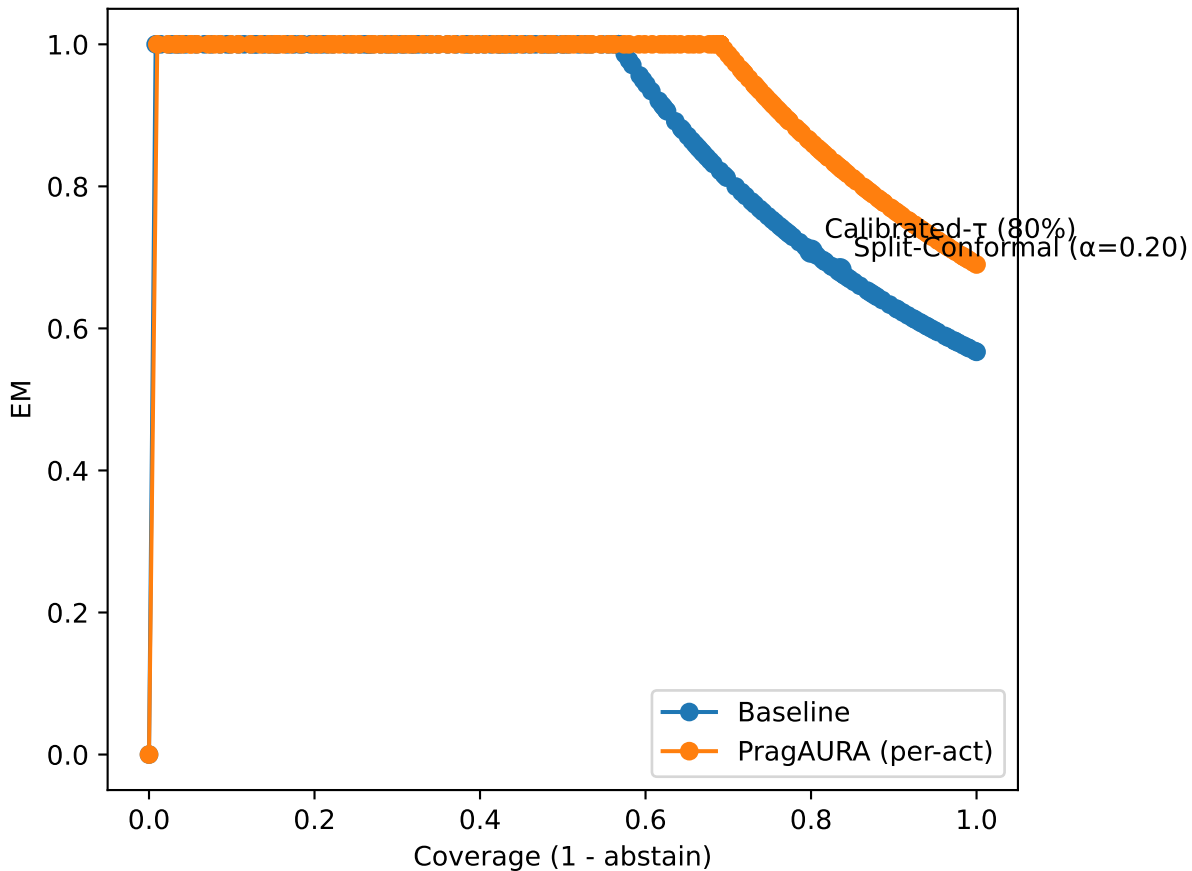

Supplement: supplementary_material [file fig_rc_squad_em_points.pdf › iclr/fig_rc_squad_em_points.pdf]

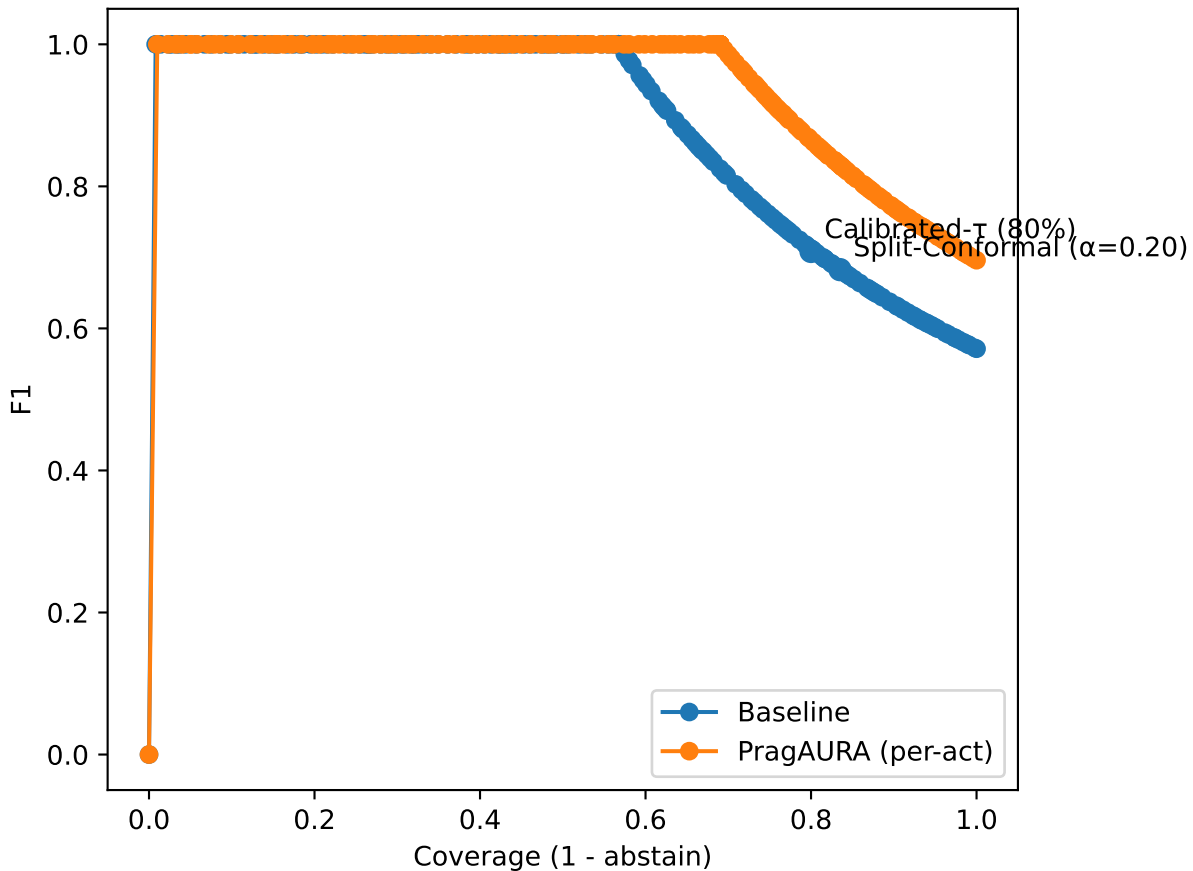

Supplement: supplementary_material [file fig_rc_squad_f1_points.pdf › iclr/fig_rc_squad_f1_points.pdf]

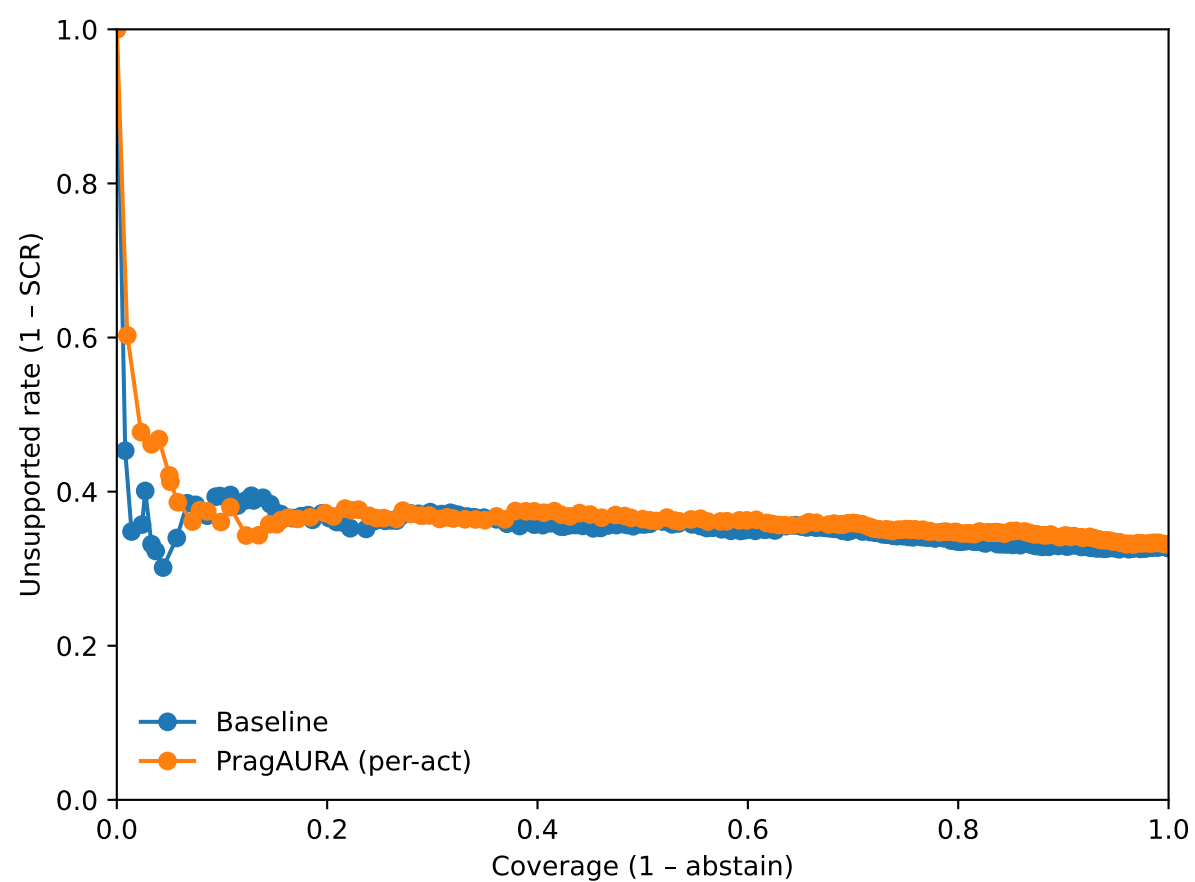

Supplement: supplementary_material [file fig_rc_squad_scr.pdf › iclr/fig_rc_squad_scr.pdf]
